# Supplementary material
Source: HighWire-hosted journal article supplement (https://nutrition.bmj.com/content/6/2/221)
Supplement: inline-supplementary-material-1 [file inline-supplementary-material-1.pdf]

**Appendix****Appendix 1-** Distribution of faculties by academic field of study

| <b>Academic field of study</b> | <b>Faculties</b>                                                                                                                             |
|--------------------------------|----------------------------------------------------------------------------------------------------------------------------------------------|
| Health                         | Medical School<br>Faculty of Pharmacy<br>Faculty of Veterinary Medicine<br>Dental School                                                     |
| Social Sciences and Humanities | School of Arts and Humanities<br>School of Law<br>School of Social and Political Sciences<br>Institute of Education<br>Faculty of Psychology |
| Arts                           | School of Architecture<br>Faculty of Fine Arts                                                                                               |
| Natural Sciences               | Faculty of Sciences<br>School of Agriculture<br>Institute of Geography and Spatial Planning<br>Faculty of human motricity                    |
| Exact Sciences and Engineering | Instituto Superior Técnico<br>School of Economics & Management                                                                               |
